# Supplementary material for: Amyloid-beta modulates microglial responses by binding to the triggering receptor expressed on myeloid cells 2 (TREM2)
Source: Springer Nature journal article supplement (doi:10.1186/s13024-018-0247-7), 2018-03-27
Supplement: MOESM1 [file 15571574]

## Supplemental Data

Figure S1

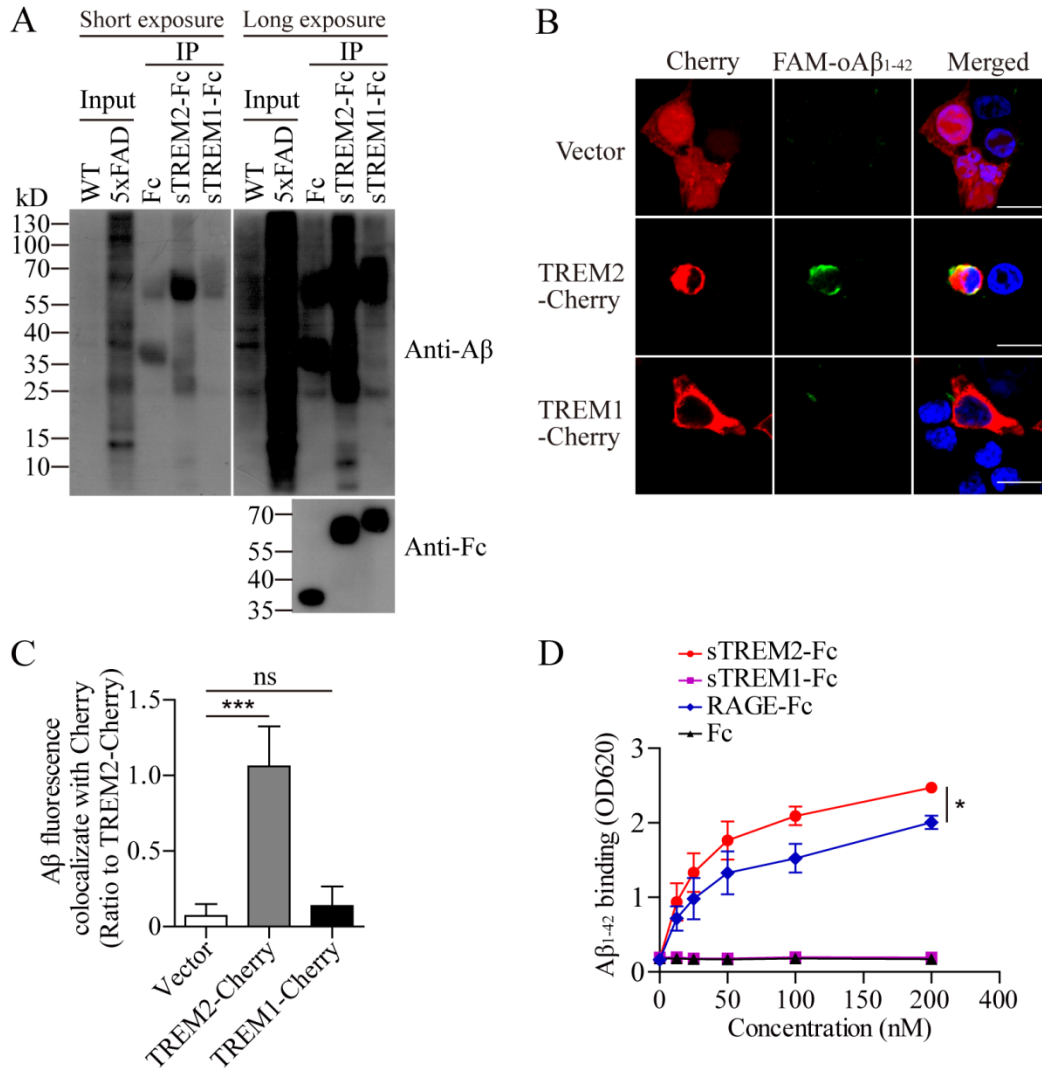

**Fig. S1 Oligomeric A $\beta_{1-42}$  specifically binds to TREM2.** (A) The Fc, sTREM2-Fc or sTREM1-Fc was pre-bound to protein A agarose beads and used as baits for immunoprecipitation of A $\beta$  from the brain lysates of 5xFAD mice. The precipitated products were separated on 4-12% Bis-Tris NuPAGE gel and further subjected to Western blotting. Note that sTREM2-Fc co-immunoprecipitated greater amounts of heterogeneous A $\beta$  species compared to Fc or

sTREM1-Fc. (B and C) HEK 293T cells were transfected with pmCherry-N1, pmCherry-TREM1 or pmCherry-TREM2 plasmid and incubated with 1.0  $\mu\text{M}$  FAM- $\text{oA}\beta_{1-42}$  for immunofluorescence analysis ( $n = 3$ , one-way ANOVA). Scale bar, 10  $\mu\text{m}$ . (D) Solid phase binding assay showing the binding affinity of  $\text{oA}\beta_{1-42}$  to sTREM2-Fc and RAGE-Fc ( $n = 3$ , two-way ANOVA). Data information: Data represent mean  $\pm$  SD. \*,  $p < 0.05$ ; \*\*\*,  $p < 0.001$ ; ns, not significant.

Figure S2

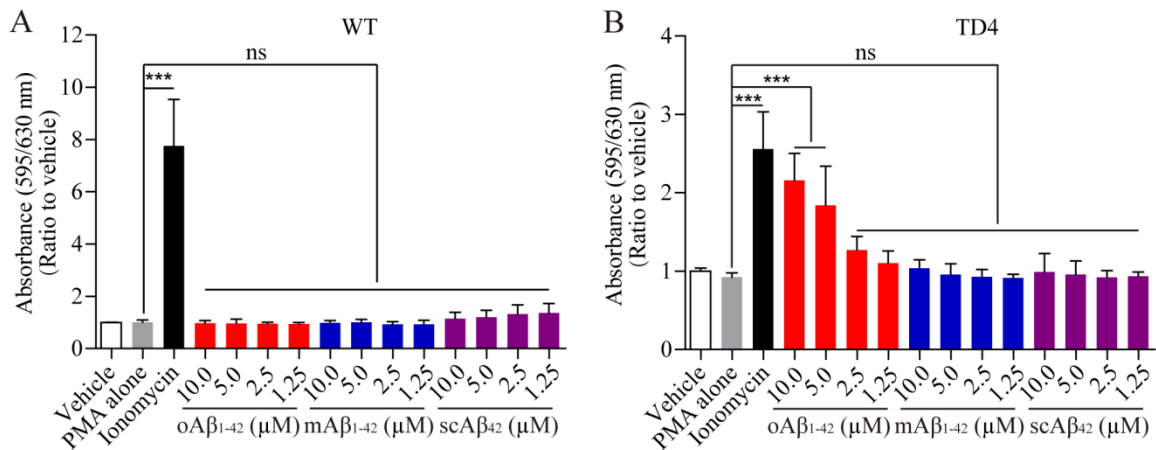

**Fig. S2 Oligomeric  $\text{A}\beta_{1-42}$  specifically activates TREM2 reporter cells.** (A and B) WT (A) or TD4 BWZ reporter cells (B) were treated with  $\text{oA}\beta_{1-42}$ ,  $\text{mA}\beta_{1-42}$  or  $\text{scA}\beta_{42}$  at the indicated concentrations with the presence of PMA. Ionomycin served as a positive control. After 16 hours,  $\beta$ -galactosidase activity was determined to assess the activity of TREM2-dependent signaling (at least 4 repeats per group, one-way ANOVA). Data information: Data represent mean  $\pm$  SD. \*\*\*,  $p < 0.001$ ; ns, not significant.

Figure S3

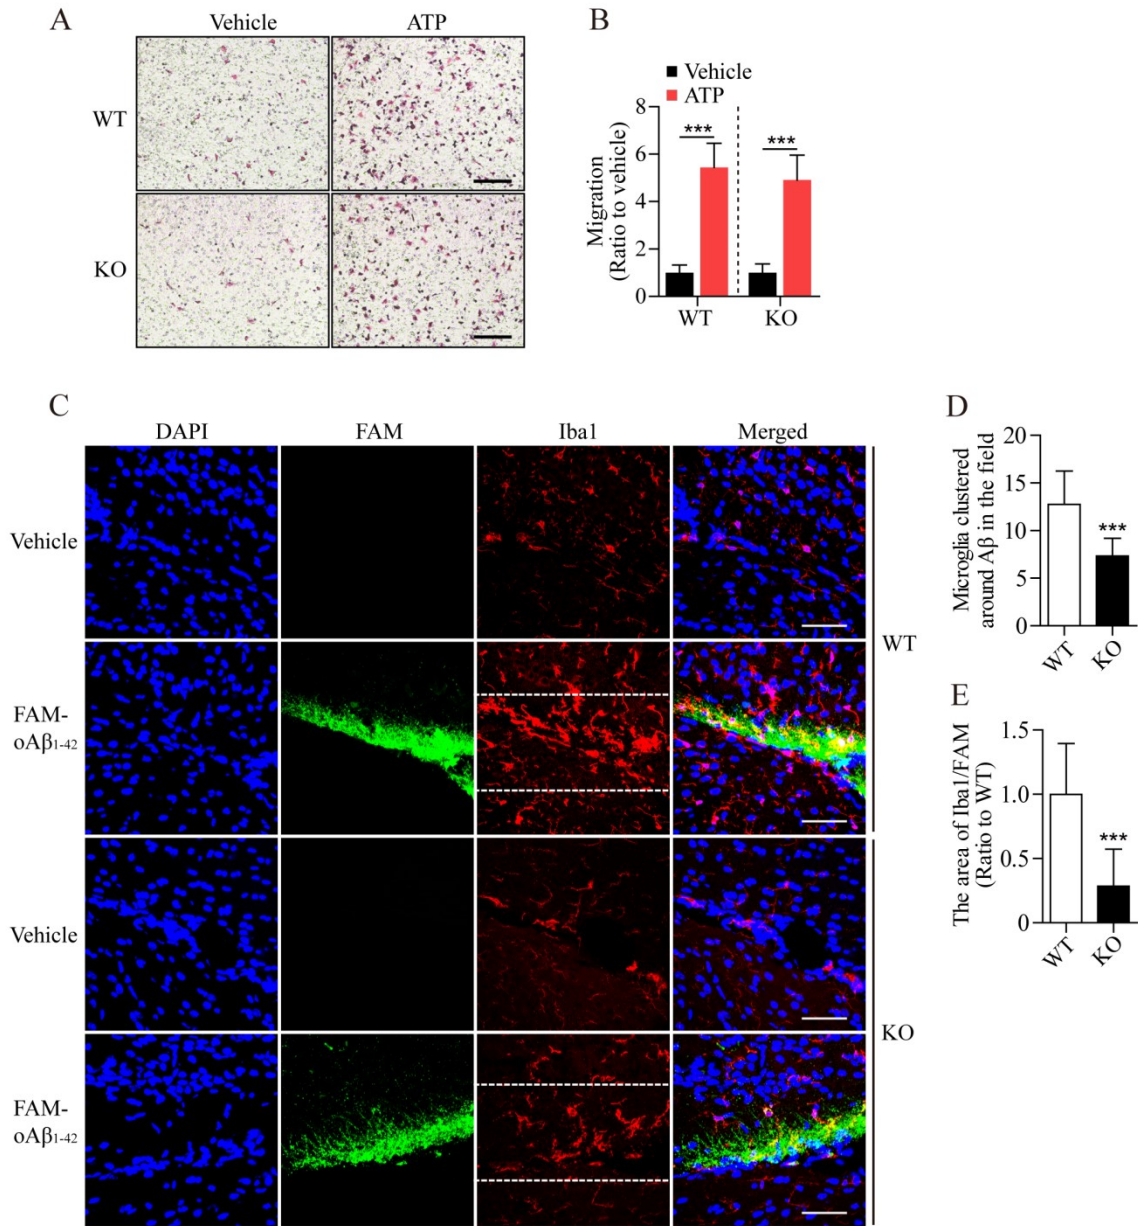

**Fig. S3** The number of microglia clustered around A $\beta$  is decreased in *Trem2*-KO mice. (A)

Primary microglial cells ( $10^5$ ) from WT or *Trem2*-knockout (KO) mice were plated onto transwell chamber inserts. Following 20 hours incubation with vehicle or ATP (60  $\mu$ M), cells migrated through the membrane were stained with hematoxylin and eosin and imaged under Nikon inverted microscope. Scale bar, 100  $\mu$ m. (B) At least 9 different fields from three independent

experiments of transwell tests were selected for quantifying the number of migrated cells (unpaired Student's *t*-test). (C) WT or *Trem2*-KO (KO) mice brain was harvested after FAM- $\text{oA}\beta_{1-42}$  injection for 16 hours. Coronal sections from these mice were stained with DAPI (blue) for nuclei, and Iba1 (red) for microglia. Representative z stack images of  $\text{oA}\beta_{1-42}$ -bearing regions are shown. Scale bar, 50  $\mu\text{m}$ . (D) At least 12 fields (212  $\mu\text{m} \times 100 \mu\text{m}$ , marked by white dotted lines in the panel C from four mice were selected for quantifying the number of microglia (co-stained with DAPI and Iba1) clustered in the  $\text{oA}\beta_{1-42}$ -bearing regions (unpaired, Student's *t*-test). (E) The Iba1-positive area within the white dotted lines in the panel C was normalized to that of FAM- $\text{oA}\beta_{1-42}$ -positive area (unpaired, Student's *t*-test). Data information: Data represent mean  $\pm$  SD. \*\*\*,  $p < 0.001$ .
